# Supplementary material for: Oxygen Vacancy-Rich Ultrathin Co3O4 Nanosheets as Nanofillers in Solid-Polymer Electrolyte for High-Performance Lithium Metal Batteries
Source: MDPI journal article supplement (doi:10.3390/catal13040711), 2023-04-08
Supplement: s1 [file s1]

# Oxygen Vacancy-rich Ultrathin $\text{Co}_3\text{O}_4$ Nanosheets as Nanofillers in Solid-polymer Electrolyte for High Performance Lithium Metal Batteries

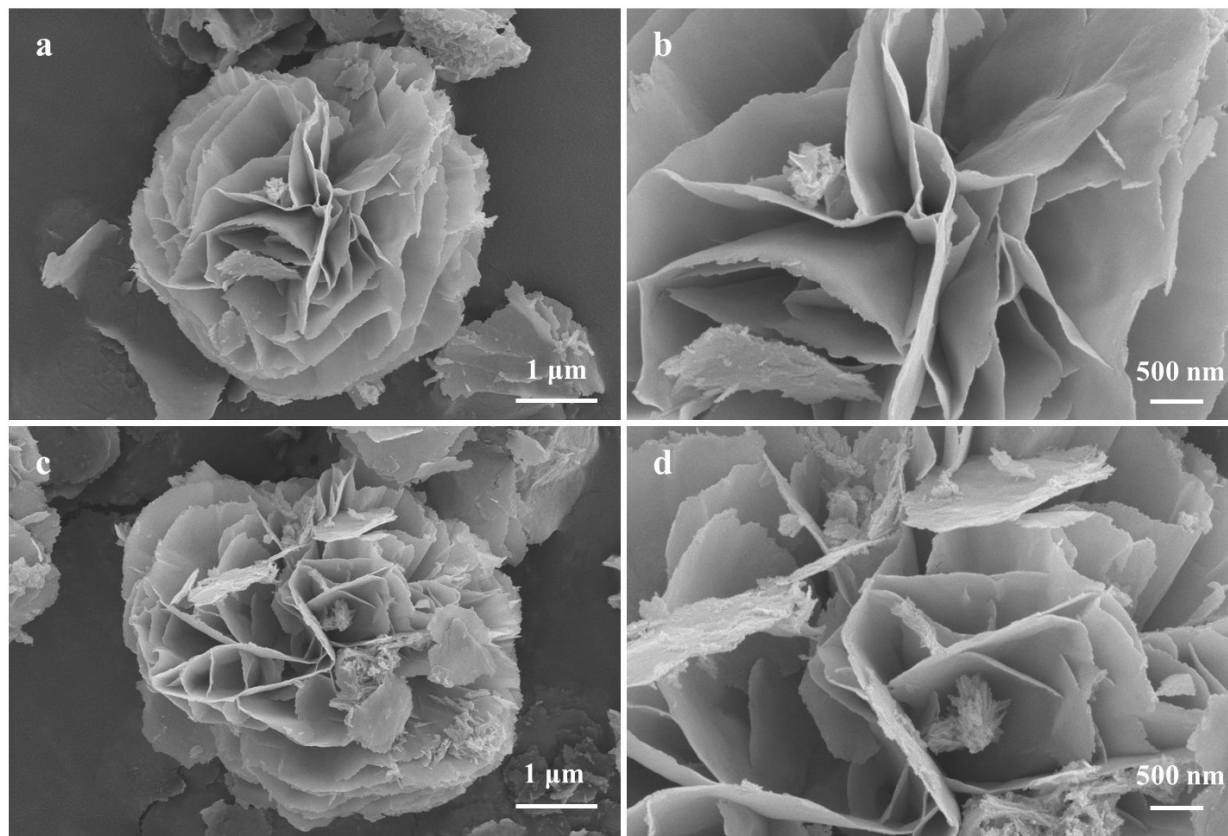

Figure S1. SEM images of (a, b)  $\text{Co}_3\text{O}_{4-y-1}$  and (c, d)  $\text{Co}_3\text{O}_{4-y-3}$ .

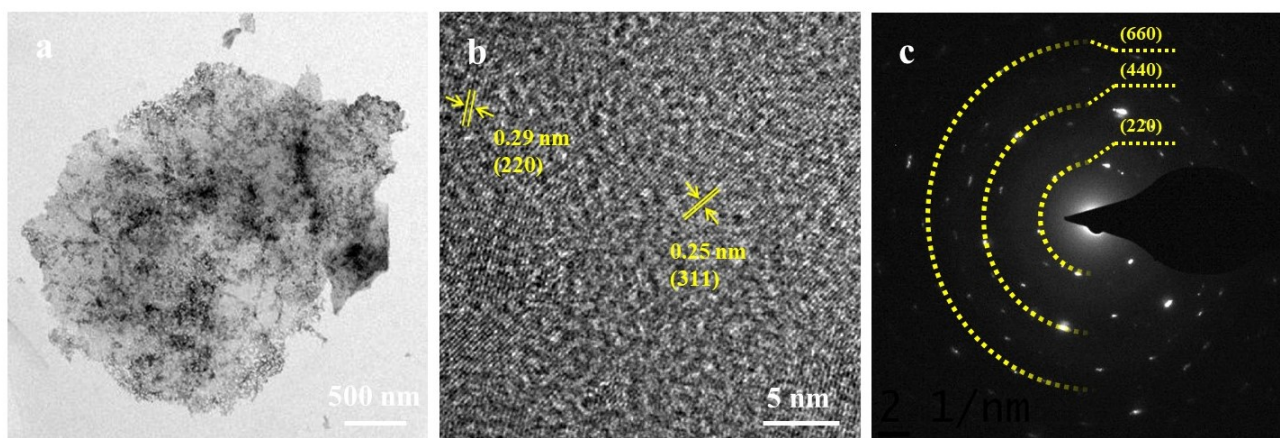

Figure S2. (a, b) TEM images and (c) SEAD pattern of  $\text{Co}_3\text{O}_4$ .

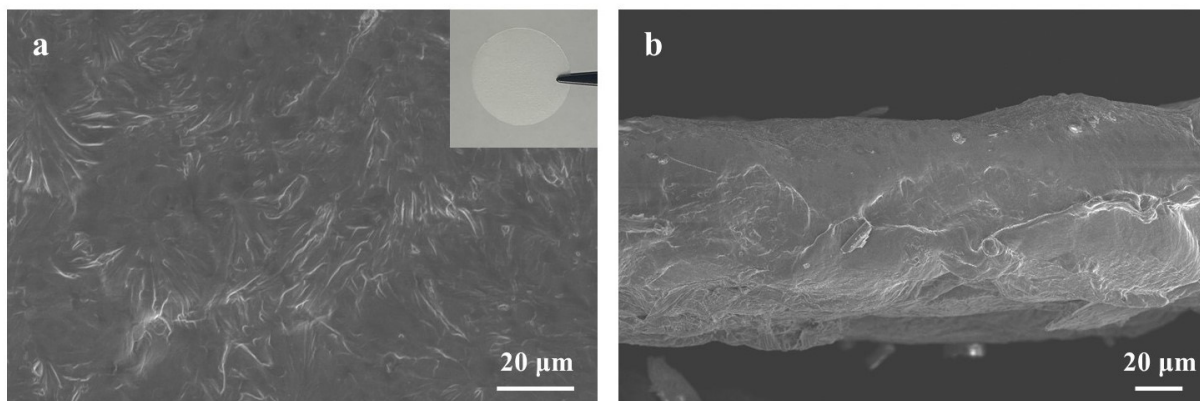

**Figure S3.** (a) Top-view and (b) side-view SEM images of PEO electrolyte film.

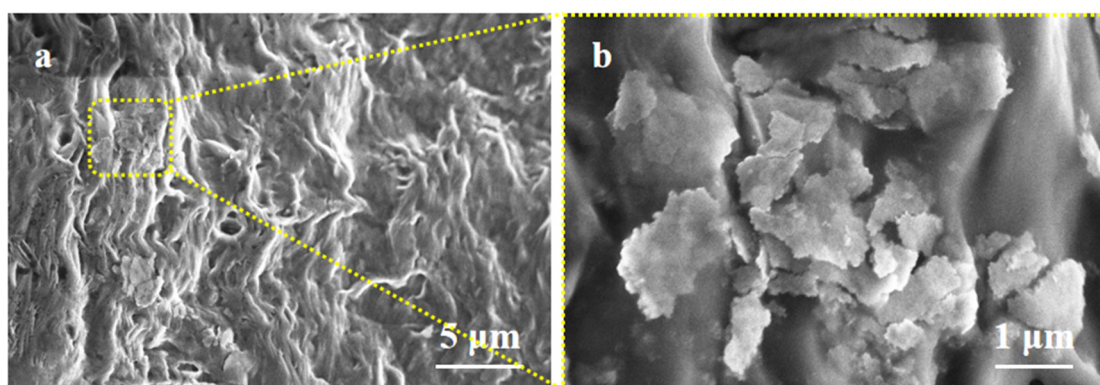

**Figure S4.** (a) SEM images of PEO/Co<sub>3</sub>O<sub>4-y-2</sub>, (b) enlarged SEM image of rectangular frame.

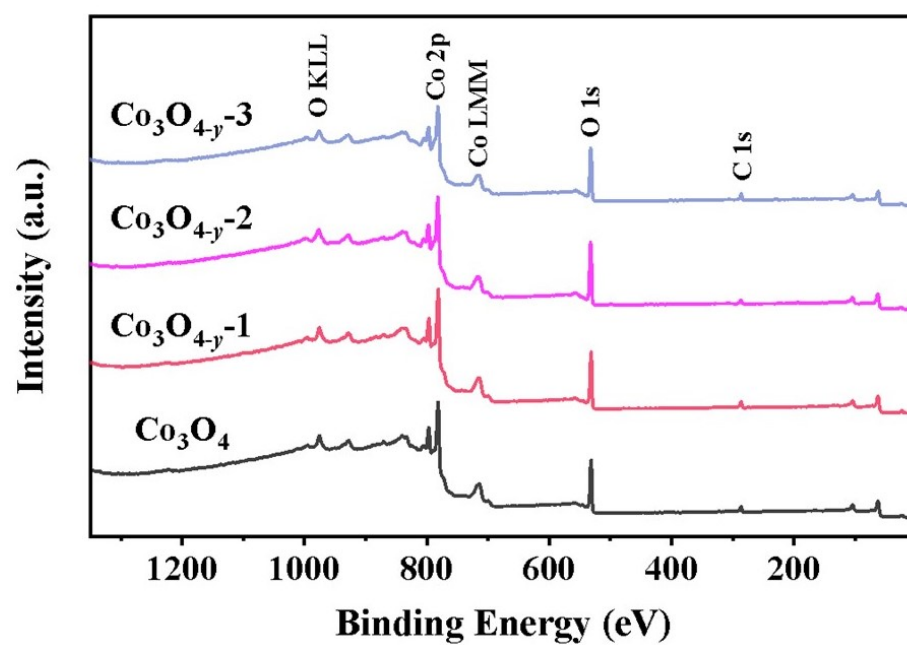

**Figure S5.** XPS survey spectra of Co<sub>3</sub>O<sub>4</sub> and Co<sub>3</sub>O<sub>4-y-x</sub> ( $x = 1, 2$  and  $3$ ).

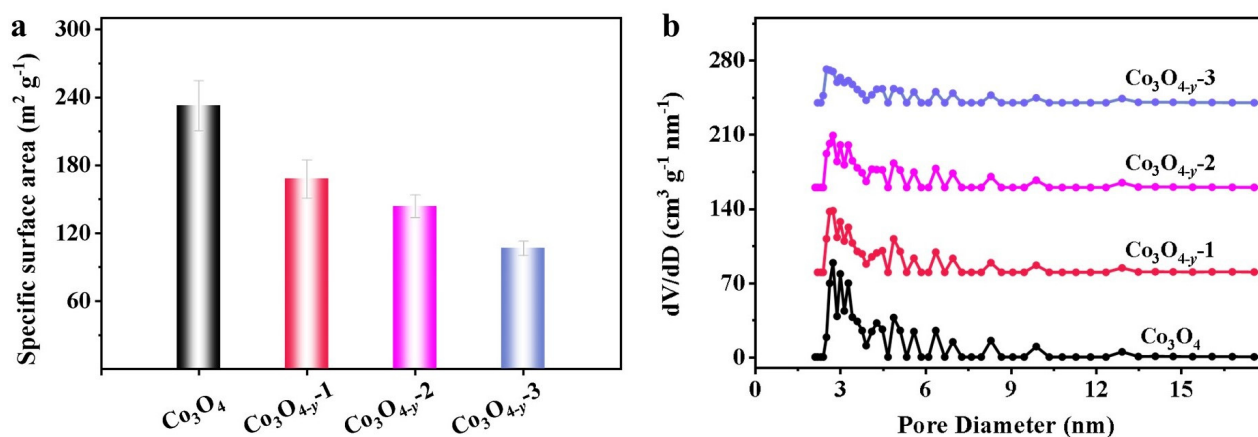

**Figure S6.** (a) BET specific surface area and (b) pore size distribution of  $\text{Co}_3\text{O}_4$  and  $\text{Co}_3\text{O}_{4-x}$  ( $x = 1, 2$  and  $3$ ).

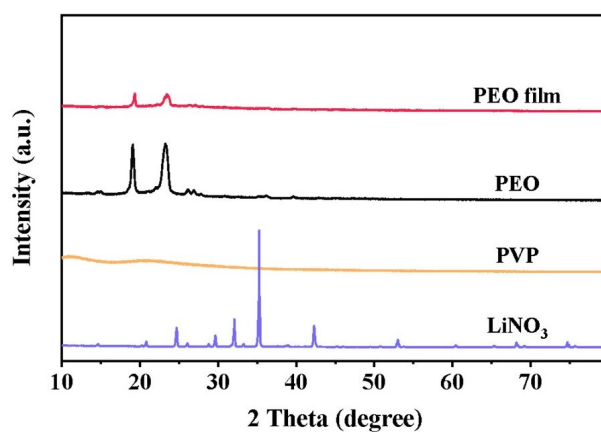

**Figure S7.** XRD patterns of  $\text{LiNO}_3$ , PVP, PEO and PEO film.

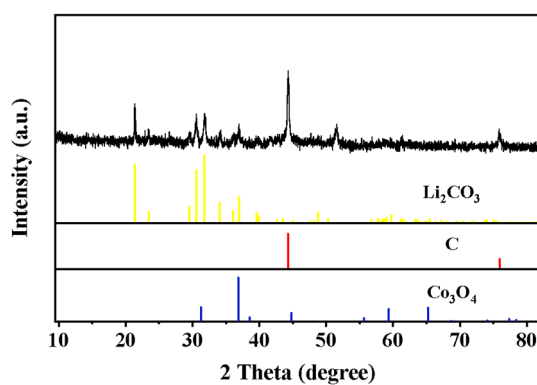

**Figure S8.** XRD pattern of the final residual of  $\text{PEO}/\text{Co}_3\text{O}_{4-x-2}$  after TGA.



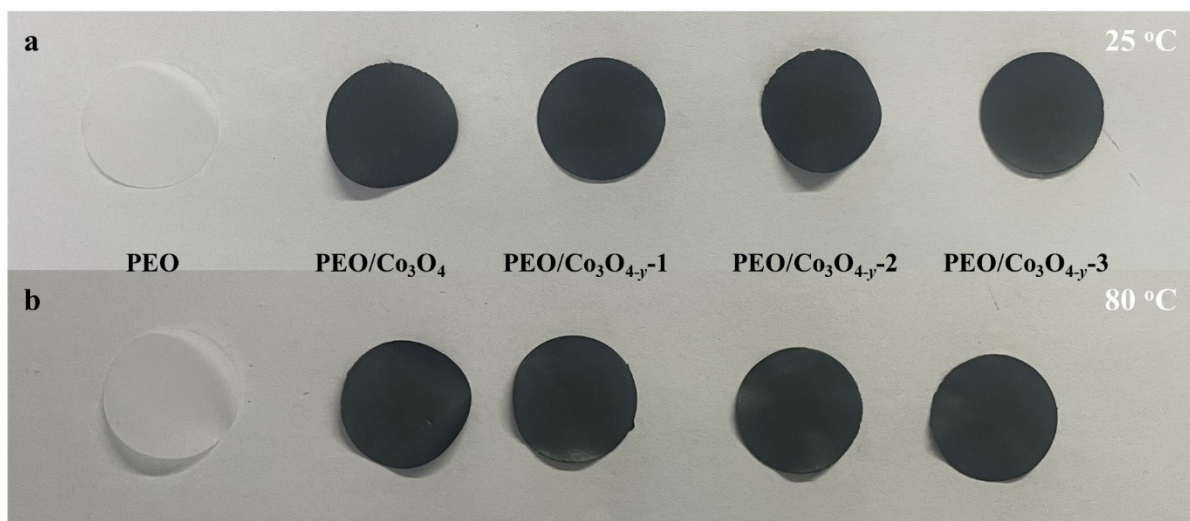

**Figure S9.** Digital photos of PEO, PEO/Co<sub>3</sub>O<sub>4</sub>, PEO/Co<sub>3</sub>O<sub>4-y</sub>-1, PEO/Co<sub>3</sub>O<sub>4-y</sub>-2 and PEO/Co<sub>3</sub>O<sub>4-y</sub>-3 films at (a) 25 °C and (b) 80 °C.

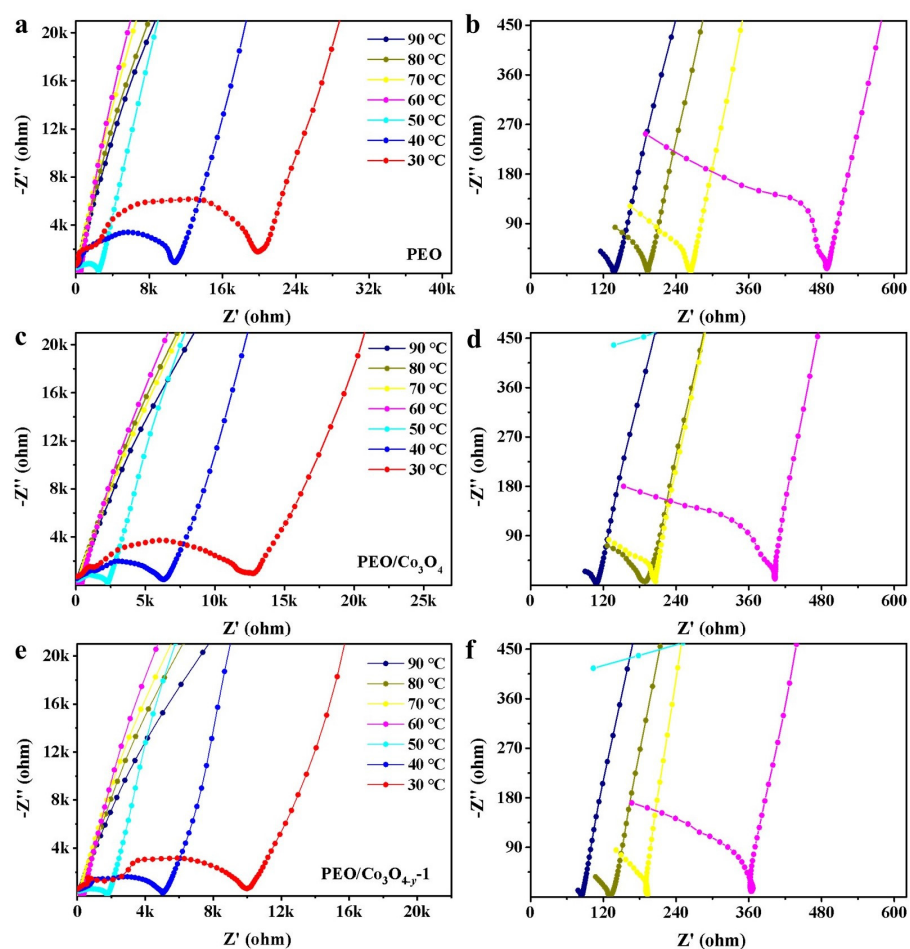

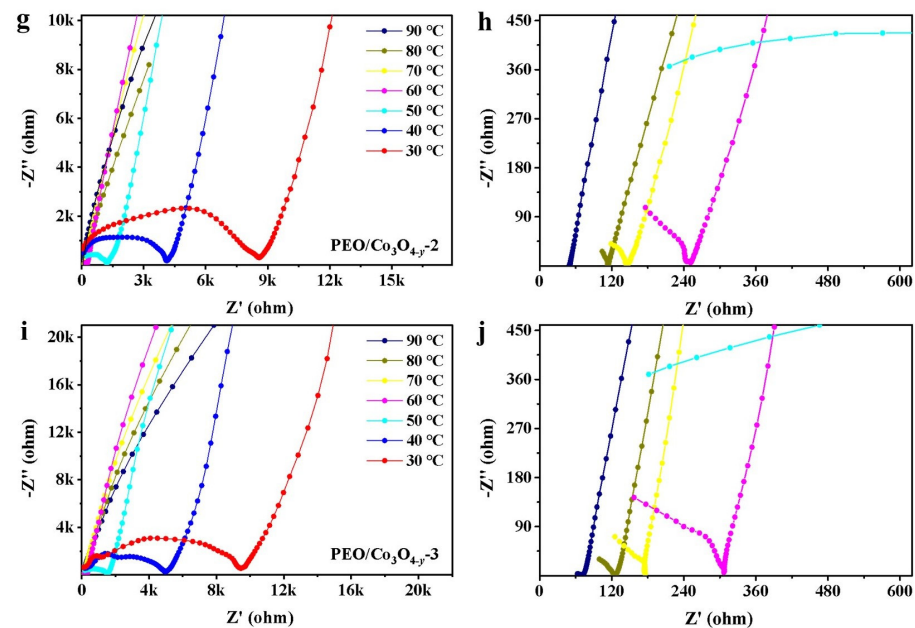

**Figure S10.** EIS spectra of symmetric SS||SPEs||SS cells using (a, b) PEO, (c, d) PEO/Co<sub>3</sub>O<sub>4</sub>, (e, f) PEO/Co<sub>3</sub>O<sub>4-y-1</sub>, (g, h) PEO/Co<sub>3</sub>O<sub>4-y-2</sub> and (i, j) PEO/Co<sub>3</sub>O<sub>4-y-3</sub> as electrolyte films at 30-90 °C.

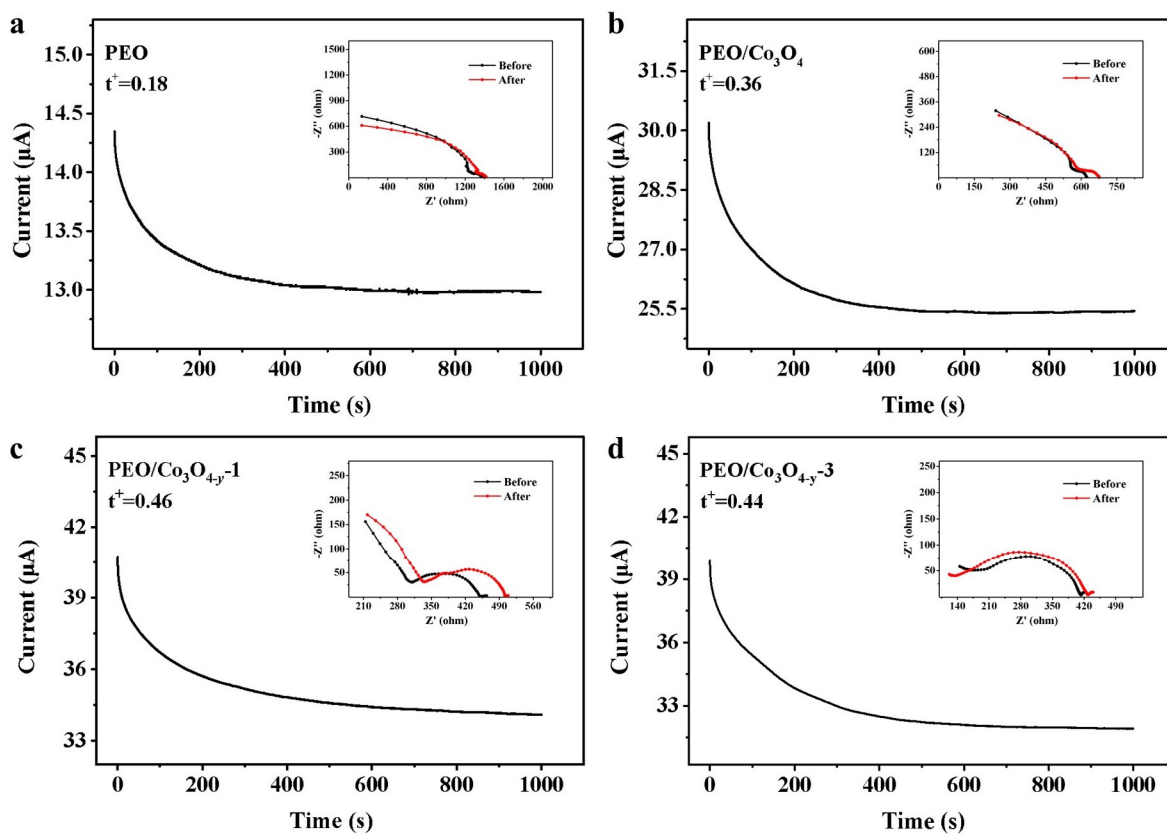

**Figure S11.** Chronoamperometry curves with a potential step of 20 mV of symmetric Li||SPEs||Li cells using (a) PEO, (b) PEO/Co<sub>3</sub>O<sub>4</sub>, (c) PEO/Co<sub>3</sub>O<sub>4-y-1</sub> and (d) PEO/Co<sub>3</sub>O<sub>4-y-3</sub> as the electrolyte films. Inset: EIS spectra of the cell before and after polarization.

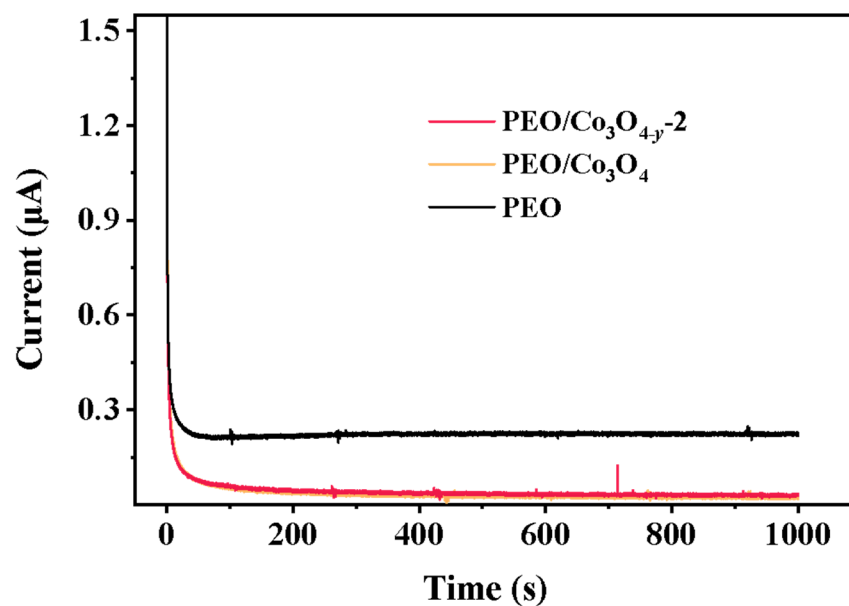

**Figure S12.** Polarization current–time curve of PEO, PEO/Co<sub>3</sub>O<sub>4</sub> and PEO/Co<sub>3</sub>O<sub>4-y</sub>-2 electrolyte with an applied external voltage of 0.1 V.

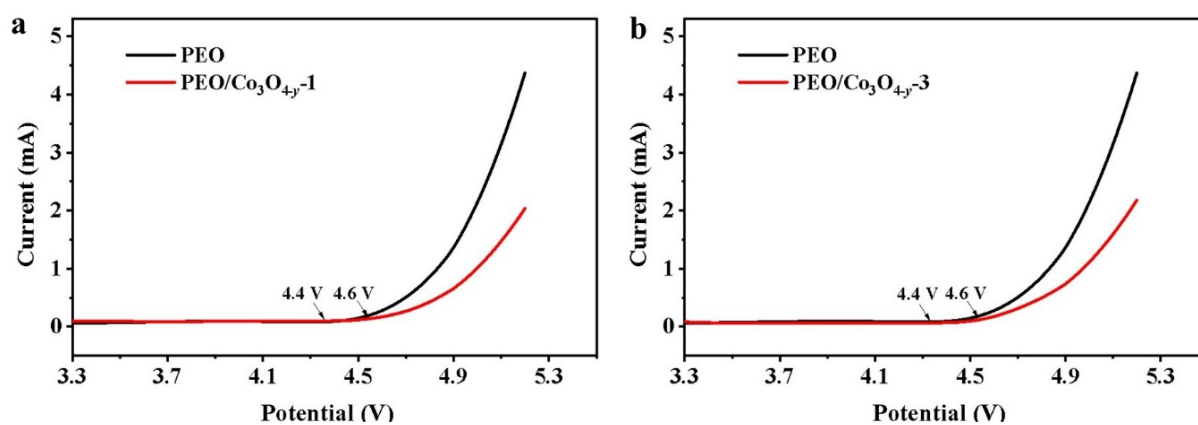

**Figure S13.** LSV curves at 0.1 mV s<sup>-1</sup> of asymmetric SS || SPEs || Li cells using (a) PEO/Co<sub>3</sub>O<sub>4-y</sub>-1, (b) PEO/Co<sub>3</sub>O<sub>4-y</sub>-3 as the electrolyte films.

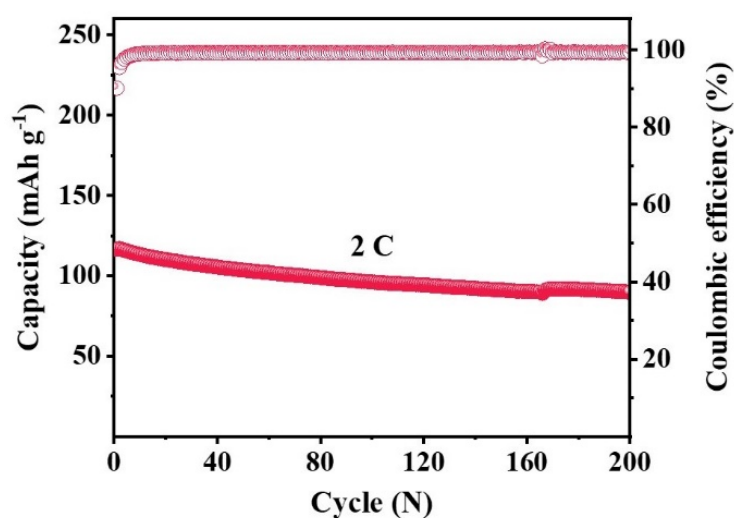

**Figure S14.** Cycling performance of Li || PEO/Co<sub>3</sub>O<sub>4-y</sub>-2 || LiFePO<sub>4</sub> cell at 2 C.

**Table S1.** Detailed XPS and Raman analysis results of Co<sub>3</sub>O<sub>4</sub> and Co<sub>3</sub>O<sub>4-y</sub>-x (x = 1, 2 and 3).

| Sample                              | Co <sup>2+</sup> / Co <sup>2+</sup> + Co <sup>3+</sup> (%) | O <sub>Ads</sub> / O <sub>Ads</sub> + O <sub>Lat</sub> (%) | FWHM |
|-------------------------------------|------------------------------------------------------------|------------------------------------------------------------|------|
| Co <sub>3</sub> O <sub>4</sub>      | 37.7                                                       | 20.9                                                       | 45.8 |
| Co <sub>3</sub> O <sub>4-y</sub> -1 | 58.1                                                       | 33.7                                                       | 63.4 |
| Co <sub>3</sub> O <sub>4-y</sub> -2 | 63.4                                                       | 48.2                                                       | 82.7 |
| Co <sub>3</sub> O <sub>4-y</sub> -3 | 68.9                                                       | 58.9                                                       | 99.1 |

**Table S2.** Pore volume and average pore size of Co<sub>3</sub>O<sub>4</sub> and Co<sub>3</sub>O<sub>4-y</sub>-x (x = 1, 2 and 3).

| Sample                              | Pore volume (cm <sup>3</sup> /g) | Average pore size (Å) |
|-------------------------------------|----------------------------------|-----------------------|
| Co <sub>3</sub> O <sub>4</sub>      | 0.376                            | 41.19                 |
| Co <sub>3</sub> O <sub>4-y</sub> -1 | 0.263                            | 41.59                 |
| Co <sub>3</sub> O <sub>4-y</sub> -2 | 0.238                            | 44.01                 |
| Co <sub>3</sub> O <sub>4-y</sub> -3 | 0.183                            | 42.36                 |

**Table S3.** R<sub>ct</sub> data of symmetric SS||SPEs||SS cells using PEO, PEO/Co<sub>3</sub>O<sub>4</sub>, PEO/Co<sub>3</sub>O<sub>4-y</sub>-x (x = 1, 2 and 3) as the electrolyte films at 30-90 °C.

| Temperature (°C) | R <sub>ct</sub> (Ω) |                                    |                                         |                                         |                                         |
|------------------|---------------------|------------------------------------|-----------------------------------------|-----------------------------------------|-----------------------------------------|
|                  | PEO                 | PEO/Co <sub>3</sub> O <sub>4</sub> | PEO/Co <sub>3</sub> O <sub>4-y</sub> -1 | PEO/Co <sub>3</sub> O <sub>4-y</sub> -2 | PEO/Co <sub>3</sub> O <sub>4-y</sub> -3 |
| 90               | 137                 | 108                                | 84                                      | 49                                      | 70                                      |
| 80               | 193                 | 180                                | 131                                     | 114                                     | 123                                     |
| 70               | 263                 | 205                                | 191                                     | 145                                     | 175                                     |
| 60               | 489                 | 405                                | 361                                     | 251                                     | 307                                     |
| 50               | 2475                | 2291                               | 1772                                    | 1211                                    | 1527                                    |
| 40               | 10740               | 6289                               | 5052                                    | 4125                                    | 4971                                    |
| 30               | 19930               | 12730                              | 10072                                   | 8594                                    | 9512                                    |

**Table S4.** Comparisons of the electrochemical performance between Co<sub>3</sub>O<sub>4-y</sub> and previous reported nanofillers enhanced SPEs.

| Nanofiller                                            | Polymer/lithium salt               | Enhancement                                                                                                               | Reference |
|-------------------------------------------------------|------------------------------------|---------------------------------------------------------------------------------------------------------------------------|-----------|
| Co <sub>3</sub> O <sub>4-y</sub>                      |                                    | This work                                                                                                                 |           |
| 10 wt.% TiO <sub>2</sub>                              | PEO/LiClO <sub>4</sub>             | $\sigma = 2 \times 10^{-4}$ S cm <sup>-1</sup> at 60 °C                                                                   | [1]       |
| Vermiculite sheets (VS)                               | PEO/LiTFSI                         | LFP  CSSE  Li, 167 mA h g <sup>-1</sup> at 0.1C, 82% capacity retention after 200 cycles at 0.5C                          | [2]       |
| Y <sub>2</sub> O <sub>3</sub> -doped ZrO <sub>2</sub> | PAN/LiClO <sub>4</sub>             | $\sigma = 1.07 \times 10^{-5}$ S cm <sup>-1</sup> at 30 °C                                                                | [3]       |
| Ca-CeO <sub>2</sub>                                   | PEO/LiTFSI                         | 100 mAh g <sup>-1</sup> at current density of 2 C, 93 mAh g <sup>-1</sup> after 200 cycles at 1 C                         | [4]       |
| SiO <sub>2</sub>                                      | PEO/LiTFSI/SN                      | LFP  10I  Li, 148.3 mAh g <sup>-1</sup> of initial cycle, capacity retention of 88% after 400 cycles at 0.5 C             | [5]       |
| LiDGO                                                 | PEO/LiTFSI                         | LFP  CSSE  Li, 157 to 139 mAh g <sup>-1</sup> after 200 cycles with a low capacity retention of 88.5% at 0.5 C            | [6]       |
| 3D Ce-MOF                                             | PEO/LiTFSI                         | Li  CSPE  FeF <sub>3</sub> , 604 mAh g <sup>-1</sup> of initial cycle, 200 mAh g <sup>-1</sup> after 1200 cycles at 0.5 C | [7]       |
| GO                                                    | PEO/LiTFSI                         | LFP  GO-PEO  Li, 142 mAh g <sup>-1</sup> of initial cycle, 91% capacity retention after 100 cycles at 0.5 C               | [8]       |
| PAN-FMP                                               | PEO/LiTFSI                         | NMC811  GO-PEO  Li, 141.2 mA h g <sup>-1</sup> of initial cycle, 124.3 mA h g <sup>-1</sup> after 160 cycles              | [9]       |
| Nano ZnO                                              | PEO/LiTFSI /Pyr <sub>14</sub> TFSI | $\sigma = 7.1 \times 10^{-3}$ S cm <sup>-1</sup> at 80 °C                                                                 | [10]      |
| MnO <sub>2</sub>                                      | PEO/LiTFSI                         | LFP  CSPE  Li, 110 mAh g <sup>-1</sup> of initial cycle, 143.5 mAh g <sup>-1</sup> after 300 cycles at 0.5 C              | [11]      |

## References

- Jung, S.; Kim, D.W.; Lee, S.D.; Cheong, M.; Nguyen, D.Q.; Cho, B.W.; Kim, H.S. Fillers for solid-state polymer electrolytes: Highlight. *Bull. Korean Chem. Soc.* **2009**, *30*, 2355–2361, doi:10.5012/BKCS.2009.30.10.2355.
- Tang, W.; Tang, S.; Guan, X.; Zhang, X.; Xiang, Q.; Luo, J. High-performance solid polymer electrolytes filled with vertically aligned 2D materials. *Adv. Funct. Mater.* **2019**, *29*, 1900648, doi:10.1002/adfm.201900648.
- Liu, W.; Lin, D.; Sun, J.; Zhou, G.; Cui, Y. Improved Lithium Ionic Conductivity in Composite Polymer Electrolytes

- with Oxide-Ion Conducting Nanowires. *ACS Nano* **2016**, *10*, 11407–11413, doi:10.1021/acsnano.6b06797.
4. Chen, H.; Adekoya, D.; Hencz, L.; Ma, J.; Chen, S.; Yan, C.; Zhao, H.; Cui, G.; Zhang, S. Stable seamless interfaces and rapid ionic conductivity of Ca–CeO<sub>2</sub>/LiTFSI/PEO composite electrolyte for high-rate and high-voltage all-solid-state battery. *Adv. Energy Mater.* **2020**, *10*, 2000049, doi:10.1002/aenm.202000049.
  5. Wang, C.; Yang, T.; Zhang, W.; Huang, H.; Gan, Y.; Xia, Y.; He, X.; Zhang, J. Hydrogen bonding enhanced SiO<sub>2</sub>/PEO composite electrolytes for solid-state lithium batteries. *J. Mater. Chem. A* **2022**, *10*, 3400–3408, doi:10.1039/D1TA10607D.
  6. Yang, Z.; Sun, Z.; Liu, C.; Li, Y.; Zhou, G.; Zuo, S.; Wang, J.; Wu, W. Lithiated nanosheets hybridized solid polymer electrolyte to construct Li<sup>+</sup> conduction highways for advanced all-solid-state lithium battery. *J. Power Sources* **2021**, *484*, 229287, doi:10.1016/j.jpowsour.2020.229287.
  7. Wu, X.; Chen, K.; Yao, Z.; Hu, J.; Huang, M.; Meng, J.; Ma, S.; Wu, T.; Cui, Y.; Li, C. Metal organic framework reinforced polymer electrolyte with high cation transference number to enable dendrite-free solid state Li metal conversion batteries. *J. Power Sources* **2021**, *501*, 229946, doi:10.1016/j.jpowsour.2021.229946.
  8. Wen, J.; Zhao, Q.; Jiang, X.; Ji, G.; Wang, R.; Lu, G.; Long, J.; Hu, N.; Xu, C. Graphene oxide enabled flexible PEO-based solid polymer electrolyte for all-solid-state lithium metal battery. *ACS Appl. Energy Mater.* **2021**, *4*, 3660–3669, doi:10.1021/acsaem.1c00090.
  9. Li, C.; Zhou, S.; Dai, L.; Zhou, X.; Zhang, B.; Chen, L.; Zeng, T.; Liu, Y.; Tang, Y.; Jiang, J.; et al. Porous polyamine/PEO composite solid electrolyte for high performance solid-state lithium metal batteries. *J. Mater. Chem. A* **2021**, *9*, 24661–24669, doi:10.1039/D1TA04599G.
  10. Nematdoust, S.; Najjar, R.; Bresser, D.; Passerini, S. Understanding the role of nanoparticles in PEO-based hybrid polymer electrolytes for solid-state lithium–polymer batteries. *J. Phys. Chem. C* **2020**, *124*, 27907–27915, doi:10.1021/acs.jpcc.0c08749.
  11. Li, Y.; Sun, Z.; Liu, D.; Gao, Y.; Wang, Y.; Bu, H.; Li, M.; Zhang, Y.; Gao, G.; Ding, S. A composite solid polymer electrolyte incorporating MnO<sub>2</sub> nanosheets with reinforced mechanical properties and electrochemical stability for lithium metal batteries. *J. Mater. Chem. A* **2020**, *8*, 2021–2032, doi:10.1039/C9TA11542K.
